# Supplementary material
Source: MDPI journal article supplement (https://www.mdpi.com/2071-1050/13/19/10923)
Supplement: s1 [file s1]

**Table S1.** Summary of the reviewed articles related to studying UHI in HW.

| Location                   | Climate | UHI Type                       | Period                                |                                    | Method                                  | HM (K)                                         | Ref |
|----------------------------|---------|--------------------------------|---------------------------------------|------------------------------------|-----------------------------------------|------------------------------------------------|-----|
|                            |         |                                | HW days                               | Reference days                     |                                         |                                                |     |
| Singapore (Singapore)      | Af      | UHI <sub>UC</sub> <sub>L</sub> | 17–19/April/2016                      | 3–5/April/2016<br>24–26/April/2016 | In-situ measure<br>Numerical simulation | 0                                              | [1] |
| Cochin (India)             | Am      | UHI <sub>surf</sub>            | Data collection: April–June/2003–2016 |                                    | Remote sensing                          | –2.291 (daytime)<br>–0.411 (night)             | [2] |
| Kollam (India)             | Am      | UHI <sub>surf</sub>            | Data collection: April–June/2003–2016 |                                    | Remote sensing                          | –2.865 (daytime)<br>0 (night)<br>–1.5465       | [2] |
| Kottayam (India)           | Am      | UHI <sub>surf</sub>            | Data collection: April–June/2003–2016 |                                    | Remote sensing                          | (daytime)<br>–0.0125 (night)<br>–0.0505        | [2] |
| Thiruvananthapuram (India) | Am      | UHI <sub>surf</sub>            | Data collection: April–June/2003–2016 |                                    | Remote sensing                          | (daytime)<br>+0.1595 (night)                   | [2] |
| Thrissur (India)           | Am      | UHI <sub>surf</sub>            | Data collection: April–June/2003–2016 |                                    | Remote sensing                          | –1.027 (daytime)<br>–0.6805 (night)<br>–0.5135 | [2] |
| Tiruvalla (India)          | Am      | UHI <sub>surf</sub>            | Data collection: April–June/2003–2016 |                                    | Remote sensing                          | (daytime)<br>–0.5435 (night)                   | [2] |
| Bhiwandi (India)           | Aw      | UHI <sub>surf</sub>            | Data collection: April–June/2003–2016 |                                    | Remote sensing                          | +0.012 (daytime)<br>+0.0075 (night)<br>–0.6085 | [2] |
| Mumbai (India)             | Aw      | UHI <sub>surf</sub>            | Data collection: April–June/2003–2016 |                                    | Remote sensing                          | (daytime)<br>–0.8855 (night)                   | [2] |
| Pune (India)               | Aw      | UHI <sub>surf</sub>            | Data collection: April–June/2003–2016 |                                    | Remote sensing                          | +0.055 (daytime)<br>+0.0035 (night)<br>–1.6455 | [2] |
| Balasore (India)           | Aw      | UHI <sub>surf</sub>            | Data collection: April–June/2003–2016 |                                    | Remote sensing                          | (daytime)<br>+0.639 (night)                    | [2] |
| Bhubaneswar (India)        | Aw      | UHI <sub>surf</sub>            | Data collection: April–June/2003–2016 |                                    | Remote sensing                          | –0.063 (daytime)<br>–0.9035 (night)            | [2] |

|                       |    |                     |                                       |                |                                         |     |
|-----------------------|----|---------------------|---------------------------------------|----------------|-----------------------------------------|-----|
| Bijapur (India)       | Aw | UHI <sub>surf</sub> | Data collection: April–June/2003–2016 | Remote sensing | –0.0765<br>(daytime)                    | [2] |
| Chennai (India)       | Aw | UHI <sub>surf</sub> | Data collection: April–June/2003–2016 | Remote sensing | –1.5175 (night)<br>+1.09 (daytime)      | [2] |
| Chittoor (India)      | Aw | UHI <sub>surf</sub> | Data collection: April–June/2003–2016 | Remote sensing | –0.498 (night)<br>+0.643 (daytime)      | [2] |
| Coimbatore<br>(India) | Aw | UHI <sub>surf</sub> | Data collection: April–June/2003–2016 | Remote sensing | +0.1065 (night)<br>–1.8125<br>(daytime) | [2] |
| Cuttack (India)       | Aw | UHI <sub>surf</sub> | Data collection: April–June/2003–2016 | Remote sensing | +0.487 (night)<br>–1.095 (daytime)      | [2] |
| Gulbarga (India)      | Aw | UHI <sub>surf</sub> | Data collection: April–June/2003–2016 | Remote sensing | –0.954 (night)<br>+0.2295<br>(daytime)  | [2] |
| Guntur (India)        | Aw | UHI <sub>surf</sub> | Data collection: April–June/2003–2016 | Remote sensing | –0.2075 (night)<br>–0.8265<br>(daytime) | [2] |
| Habra (India)         | Aw | UHI <sub>surf</sub> | Data collection: April–June/2003–2016 | Remote sensing | –0.163 (night)<br>–0.977 (daytime)      | [2] |
| Haldia (India)        | Aw | UHI <sub>surf</sub> | Data collection: April–June/2003–2016 | Remote sensing | +0.113 (night)<br>+0.0305<br>(daytime)  | [2] |
| Indore (India)        | Aw | UHI <sub>surf</sub> | Data collection: April–June/2003–2016 | Remote sensing | –0.703 (night)<br>–0.441 (daytime)      | [2] |
| Jamshedpur<br>(India) | Aw | UHI <sub>surf</sub> | Data collection: April–June/2003–2016 | Remote sensing | –0.4685 (night)<br>+0.4915<br>(daytime) | [2] |
| Karimnagar<br>(India) | Aw | UHI <sub>surf</sub> | Data collection: April–June/2003–2016 | Remote sensing | –0.5295 (night)<br>–1.008 (daytime)     | [2] |
| Kolkata (India)       | Aw | UHI <sub>surf</sub> | Data collection: April–June/2003–2016 | Remote sensing | –0.4865 (night)<br>–1.456 (daytime)     | [2] |
|                       |    |                     |                                       |                | –0.314 (night)                          | [2] |

|                           |     |                     |                                       |                 |                                               |     |
|---------------------------|-----|---------------------|---------------------------------------|-----------------|-----------------------------------------------|-----|
| Nagpur (India)            | Aw  | UHI <sub>surf</sub> | Data collection: April–June/2003–2016 | Remote sensing  | –0.5695<br>(daytime)<br>–0.368 (night)        | [2] |
| Nashik (India)            | Aw  | UHI <sub>surf</sub> | Data collection: April–June/2003–2016 | Remote sensing  | +0.084 (daytime)<br>+0.239 (night)            | [2] |
| Rourkela (India)          | Aw  | UHI <sub>surf</sub> | Data collection: April–June/2003–2016 | Remote sensing  | –0.335 (daytime)<br>+0.1485 (night)           | [2] |
| Sambalpur<br>(India)      | Aw  | UHI <sub>surf</sub> | Data collection: April–June/2003–2016 | Remote sensing  | +0.642 (daytime)<br>–0.588 (night)<br>+0.2705 | [2] |
| Surat (India)             | Aw  | UHI <sub>surf</sub> | Data collection: April–June/2003–2016 | Remote sensing  | (daytime)<br>–0.5625 (night)                  | [2] |
| Tiruchirapalli<br>(India) | Aw  | UHI <sub>surf</sub> | Data collection: April–June/2003–2016 | Remote sensing  | +0.053 (night)                                | [2] |
| Vadodara (India)          | Aw  | UHI <sub>surf</sub> | Data collection: April–June/2003–2016 | Remote sensing  | –1.036 (daytime)<br>–0.5555 (night)           | [2] |
| Vijayawada<br>(India)     | Aw  | UHI <sub>surf</sub> | Data collection: April–June/2003–2016 | Remote sensing  | –0.431 (daytime)<br>+0.078 (night)            | [2] |
| Warangal (India)          | Aw  | UHI <sub>surf</sub> | Data collection: April–June/2003–2016 | Remote sensing  | –0.182 (daytime)<br>+0.01 (night)             | [2] |
| Bengaluru (India)         | Aw  | UHI <sub>surf</sub> | Data collection: April–June/2003–2016 | Remote sensing  | –0.963 (daytime)<br>–0.258 (night)            | [2] |
| Bidar (India)             | Aw  | UHI <sub>surf</sub> | Data collection: April–June/2003–2016 | Remote sensing  | –0.429 (daytime)<br>–0.216 (night)            | [2] |
| Madurai (India)           | Aw  | UHI <sub>surf</sub> | Data collection: April–June/2003–2016 | Remote sensing  | –0.046 (night)                                | [2] |
| Nizamabad<br>(India)      | Aw  | UHI <sub>surf</sub> | Data collection: April–June/2003–2016 | Remote sensing  | –0.248 (daytime)<br>–0.3535 (night)           | [2] |
| Salem (India)             | Aw  | UHI <sub>surf</sub> | Data collection: April–June/2003–2016 | Remote sensing  | –2.028 (daytime)<br>+0.138 (night)            | [2] |
| Tirunelveli<br>(India)    | Aw  | UHI <sub>surf</sub> | Data collection: April–June/2003–2016 | Remote sensing  | –2.092 (daytime)<br>+0.3355 (night)           | [2] |
| Nicosia (Cyprus)          | BSh |                     | Data collection: 2007–2014            | In-situ measure | +0.9~1.3                                      | [3] |

|                        |     | $UHI_{uc}$<br>L | 66 or 68 or 108 days                  | summers 2007–<br>2014 | Remote sensing                                 |     |
|------------------------|-----|-----------------|---------------------------------------|-----------------------|------------------------------------------------|-----|
| Aurangabad<br>(India)  | BSh | $UHI_{surf}$    | Data collection: April–June/2003–2016 | Remote sensing        | –0.065 (daytime)<br>+0.196 (night)<br>–0.5175  | [2] |
| Badami (India)         | BSh | $UHI_{surf}$    | Data collection: April–June/2003–2016 | Remote sensing        | (daytime)<br>+0.318 (night)                    | [2] |
| Hyderabad<br>(India)   | BSh | $UHI_{surf}$    | Data collection: April–June/2003–2016 | Remote sensing        | –0.632 (daytime)<br>+0.1745 (night)<br>–0.4335 | [2] |
| Nalgonda (India)       | BSh | $UHI_{surf}$    | Data collection: April–June/2003–2016 | Remote sensing        | (daytime)<br>+0.4145 (night)                   | [2] |
| Ahmedabad<br>(India)   | BSh | $UHI_{surf}$    | Data collection: April–June/2003–2016 | Remote sensing        | –0.319 (daytime)<br>–0.394 (night)             | [2] |
| Ambala (India)         | BSh | $UHI_{surf}$    | Data collection: April–June/2003–2016 | Remote sensing        | +0.315 (daytime)<br>+0.449 (night)<br>–0.2385  | [2] |
| Bharatpur (India)      | BSh | $UHI_{surf}$    | Data collection: April–June/2003–2016 | Remote sensing        | (daytime)<br>–1.141 (night)                    | [2] |
| Bhavnagar<br>(India)   | BSh | $UHI_{surf}$    | Data collection: April–June/2003–2016 | Remote sensing        | –0.36 (daytime)<br>–0.4935 (night)<br>+0.1295  | [2] |
| Delhi (India)          | BSh | $UHI_{surf}$    | Data collection: April–June/2003–2016 | Remote sensing        | (daytime)<br>–0.9305 (night)<br>+0.7455        | [2] |
| Faridabad (India)      | BSh | $UHI_{surf}$    | Data collection: April–June/2003–2016 | Remote sensing        | (daytime)<br>–0.437 (night)                    | [2] |
| Gandhinagar<br>(India) | BSh | $UHI_{surf}$    | Data collection: April–June/2003–2016 | Remote sensing        | +0.181 (daytime)<br>0 (night)                  | [2] |
| Gurgaon (India)        | BSh | $UHI_{surf}$    | Data collection: April–June/2003–2016 | Remote sensing        | +0.562 (daytime)<br>–0.206 (night)             | [2] |
| Gwalior (India)        | BSh | $UHI_{surf}$    | Data collection: April–June/2003–2016 | Remote sensing        | –0.5385<br>(daytime)                           | [2] |

|                           |     |                        |                                                               |                                         |                                                       |                             |
|---------------------------|-----|------------------------|---------------------------------------------------------------|-----------------------------------------|-------------------------------------------------------|-----------------------------|
| Junagadh (India)          | BSh | UHI <sub>surf</sub>    | Data collection: April–June/2003–2016                         | Remote sensing                          | –0.9915 (night)<br>+0.087 (daytime)<br>–0.471 (night) | [2]                         |
| Kota (India)              | BSh | UHI <sub>surf</sub>    | Data collection: April–June/2003–2016                         | Remote sensing                          | –0.24 (daytime)<br>–0.087 (night)<br>–0.2685          | [2]                         |
| Kurnool (India)           | BSh | UHI <sub>surf</sub>    | Data collection: April–June/2003–2016                         | Remote sensing                          | (daytime)<br>–0.6225 (night)<br>–0.0525               | [2]                         |
| Rajkot (India)            | BSh | UHI <sub>surf</sub>    | Data collection: April–June/2003–2016                         | Remote sensing                          | (daytime)<br>–0.241 (night)<br>–0.2155                | [2]                         |
| Ajmer (India)             | BSh | UHI <sub>surf</sub>    | Data collection: April–June/2003–2016                         | Remote sensing                          | (daytime)<br>–0.8 (night)                             | [2]                         |
| Jaipur (India)            | BSh | UHI <sub>surf</sub>    | Data collection: April–June/2003–2016                         | Remote sensing                          | –0.211 (daytime)<br>–0.668 (night)                    | [2]                         |
| Udaipur (India)           | BSh | UHI <sub>surf</sub>    | Data collection: April–June/2003–2016                         | Remote sensing                          | –0.237 (daytime)<br>–0.446 (night)                    | [2]                         |
| Palma-di-Mallorca (Spain) | BSk | UHI <sub>surf</sub>    | July/2006      June–August/2000–2013                          | Remote sensing                          | +0.11                                                 | [4]                         |
| Karachi (Pakistan)        | BWh | UHI <sub>UC</sub><br>L | 17–24/June/2015      1/April–16/June/2015<br>25–30/June/2015  | In-situ measure                         | +                                                     | [5]                         |
| Phoenix (USA)             | BWh | UHI <sub>UC</sub><br>L | 21–24/July/2006      15–20&25–31/July/2006<br>1–6/August/2006 | In-situ measure<br>Numerical simulation | +                                                     | [6]                         |
| Bikaner (India)           | BWh | UHI <sub>surf</sub>    | Data collection: April–June/2003–2016                         | Remote sensing                          | +0.864 (daytime)<br>–0.5325 (night)                   | [2]                         |
| Jodhpur (India)           | BWh | UHI <sub>surf</sub>    | Data collection: April–June/2003–2016                         | Remote sensing                          | –0.202 (daytime)<br>–0.467 (night)                    | [2]                         |
| Sydney (Australia)        | Cfa | UHI <sub>UC</sub><br>L | 9–11/February/2017      13–15/February/2017                   | In-situ measure                         | –8 (daytime)<br>0 (night)                             | <b>[Err<br/>or!<br/>Ref</b> |

|                               |     |                        |                                                                                     |                                    |                                         |                            | ere<br>nce<br>sour<br>ce<br>not<br>fou<br>nd.] |
|-------------------------------|-----|------------------------|-------------------------------------------------------------------------------------|------------------------------------|-----------------------------------------|----------------------------|------------------------------------------------|
| Szeged<br>(Hungary)           | Cfa | UHI <sub>UC</sub><br>L | Data collection: summers 2014–2018<br>30/July–<br>3/August/2017                     | 30/July–<br>3/August/2014          | In-situ measure                         | +                          | [8]                                            |
| Milan (Italy)                 | Cfa | UHI <sub>UC</sub><br>L | 14–23/July/2015                                                                     | 14–23/July/2014                    | Numerical simulation                    | –0.5 (night)<br>+(daytime) | [9]                                            |
| Milan (Italy)                 | Cfa | UHI <sub>surf</sub>    | July/2006                                                                           | June–<br>August/2000–2013          | Remote sensing                          | +0.34                      | [4]                                            |
| Ancona (Italy)                | Cfa | UHI <sub>surf</sub>    | July/2006                                                                           | June–<br>August/2000–2013          | Remote sensing                          | +0.41                      | [4]                                            |
| Shanghai (China<br>Mainland)  | Cfa | UHI <sub>UC</sub><br>L | 100 days (2013–<br>2018)                                                            | 272 days (2013–<br>2018)           | In-situ measure                         | +                          | [10]                                           |
| Shanghai (China<br>Mainland)  | Cfa | UHI <sub>UC</sub><br>L | Data collection: June–August/2013–<br>2015                                          |                                    | In-situ measure                         | +0.9                       | [11]                                           |
| Guangzhou<br>(China Mainland) | Cfa | UHI <sub>UC</sub><br>L | Data collection: June–August/2013–<br>2015                                          |                                    | In-situ measure                         | +0.8                       | [11]                                           |
| New York City<br>(USA)        | Cfa | UHI <sub>UC</sub><br>L | 1–3/August/2006                                                                     | 15–31/July/2006<br>4–6/August/2006 | In-situ measure<br>Numerical simulation | +                          | [6]                                            |
| New York City<br>(USA)        | Cfa | UHI <sub>UC</sub><br>L | 4–8/July/2010                                                                       | 9–11/July/2010                     | Numerical simulation                    | +                          | [12]                                           |
| New York City<br>(USA)        | Cfa | UHI <sub>UC</sub><br>L | HW days data collection: July 2016<br>Reference days data collection: 2005–<br>2014 |                                    | In-situ measure<br>Remote sensing       | +2~3                       | [13]                                           |
| New York City<br>(USA)        | Cfa | UHI <sub>UC</sub><br>L | Data collection: July–August/2006<br>HW: 17–19/July/2006, 1–3/August/2006           |                                    | Numerical simulation                    | +1.5                       | [14]                                           |
| New York City<br>(USA)        | Cfa | UHI <sub>UC</sub><br>L | 16–18/July/2006<br>1–3/August/2006                                                  | 13–15&19–31/July<br>/2006          | Numerical simulation                    | +2                         | [15]                                           |

|                           |     |                                               |                                                                              |                                              |                                                           |        |      |
|---------------------------|-----|-----------------------------------------------|------------------------------------------------------------------------------|----------------------------------------------|-----------------------------------------------------------|--------|------|
| Washington D.C<br>(USA)   | Cfa | UHI <sub>UC</sub><br>L                        | 16–18/July/2006<br>1–3/August/2006                                           | 4–9/August/2006<br>13–15&19–31/July<br>/2006 | Numerical simulation                                      | +1.5~2 | [15] |
| Baltimore (USA)           | Cfa | UHI <sub>UC</sub><br>L<br>UHI <sub>surf</sub> | 7–10/June/2008                                                               | 5–6&11–<br>14/June/2008                      | Numerical simulation<br>Remote sensing<br>In-situ measure | +      | [16] |
| Baltimore (USA)           | Cfa | UHI <sub>UC</sub><br>L                        | 16–18/July/2006<br>1–3/August/2006                                           | 13–15&19–31/July<br>/2006<br>4–9/August/2006 | Numerical simulation                                      | +1.5~2 | [15] |
| Philadelphia<br>(USA)     | Cfa | UHI <sub>UC</sub><br>L                        | 16–18/July/2006<br>1–3/August/2006                                           | 13–15&19–31/July<br>/2006<br>4–9/August/2006 | Numerical simulation                                      | 0      | [15] |
| Bridgeport (USA)          | Cfa | UHI <sub>UC</sub><br>L                        | 16–18/July/2006<br>1–3/August/2006                                           | 13–15&19–31/July<br>/2006<br>4–9/August/2006 | Numerical simulation                                      | 0      | [15] |
| Harrisburg (USA)          | Cfa | UHI <sub>UC</sub><br>L                        | 16–18/July/2006<br>1–3/August/2006                                           | 13–15&19–31/July<br>/2006<br>4–9/August/2006 | Numerical simulation                                      | 0      | [15] |
| Atlanta (USA)             | Cfa | UHI <sub>UC</sub><br>L                        | Data collection: June–August/1984–<br>2007                                   |                                              | Numerical simulation<br>In-situ measure                   | +      | [17] |
| Oklahoma City<br>(USA)    | Cfa | UHI <sub>UC</sub><br>L                        | 31/July–<br>5/August/2008                                                    | 15–30/July/2008<br>6–15/August/2008          | In-situ measure                                           | 0      | [18] |
| Bucuresti<br>(Romania)    | Cfa | UHI <sub>surf</sub>                           | July/2006                                                                    | June–August/2000–<br>2013                    | Remote sensing                                            | +0.10  | [4]  |
| Craiova<br>(Romania)      | Cfa | UHI <sub>surf</sub>                           | July/2006                                                                    | June–August/2000–<br>2013                    | Remote sensing                                            | +0.15  | [4]  |
| Taipei (Taiwan<br>Region) | Cfa | UHI <sub>surf</sub>                           | 23/July/2000, 22/July/2002,<br>21/July/2004, 22/July/2007 and<br>3/July/2010 |                                              | Remote sensing                                            | +      | [19] |
| Yilan (Taiwan<br>Region)  | Cfa | UHI <sub>surf</sub>                           | 23/July/2000, 22/July/2002,<br>21/July/2004, 22/July/2007 and<br>3/July/2010 |                                              | Remote sensing                                            | +      | [20] |

|                      |     |                        |                                                              |                           |                                         |                          |      |
|----------------------|-----|------------------------|--------------------------------------------------------------|---------------------------|-----------------------------------------|--------------------------|------|
| Varanasi (India)     | Cfa | UHI <sub>surf</sub>    | Data collection: April–June/2003–2016                        |                           | Remote sensing                          | -                        | [2]  |
| Jhansi (India)       | Cfa | UHI <sub>surf</sub>    | Data collection: April–June/2003–2016                        |                           | Remote sensing                          | + (daytime)<br>– (night) | [2]  |
| Dijon (France)       | Cfb | UHI <sub>UC</sub><br>L | Data collection: 6/June/2014–<br>29/July/2019<br>HW days: 53 |                           | In-situ measure                         | –                        | [21] |
| Bordeaux<br>(France) | Cfb | UHI <sub>surf</sub>    | July/2006                                                    | June–<br>August/2000–2013 | Remote sensing                          | –0.15                    | [4]  |
| Grenoble (France)    | Cfb | UHI <sub>surf</sub>    | July/2006                                                    | June–<br>August/2000–2013 | Remote sensing                          | +0.16                    | [4]  |
| Lille (France)       | Cfb | UHI <sub>surf</sub>    | July/2006                                                    | June–<br>August/2000–2013 | Remote sensing                          | +0.86                    | [4]  |
| Limoges (France)     | Cfb | UHI <sub>surf</sub>    | July/2006                                                    | June–<br>August/2000–2013 | Remote sensing                          | +0.36                    | [4]  |
| Lyon (France)        | Cfb | UHI <sub>surf</sub>    | July/2006                                                    | June–<br>August/2000–2013 | Remote sensing                          | +0.18                    | [4]  |
| Orleans (France)     | Cfb | UHI <sub>surf</sub>    | July/2006                                                    | June–<br>August/2000–2013 | Remote sensing                          | +0.35                    | [4]  |
| Paris (France)       | Cfb | UHI <sub>surf</sub>    | July/2006                                                    | June–<br>August/2000–2013 | Remote sensing                          | +0.46                    | [4]  |
| Paris (France)       | Cfb | UHI <sub>UC</sub><br>L | Data collection: 1/May–<br>30/September/2003                 |                           | Numerical simulation<br>In-situ measure | +                        | [22] |
| Poitiers (France)    | Cfb | UHI <sub>surf</sub>    | July/2006                                                    | June–<br>August/2000–2013 | Remote sensing                          | +0.32                    | [4]  |
| Rouen (France)       | Cfb | UHI <sub>surf</sub>    | July/2006                                                    | June–<br>August/2000–2013 | Remote sensing                          | +0.80                    | [4]  |
| Toulouse<br>(France) | Cfb | UHI <sub>surf</sub>    | July/2006                                                    | June–<br>August/2000–2013 | Remote sensing                          | +0.32                    | [4]  |
| Tours (France)       | Cfb | UHI <sub>surf</sub>    | July/2006                                                    | June–<br>August/2000–2013 | Remote sensing                          | +0.66                    | [4]  |
| Reading (UK)         | Cfb | UHI <sub>UC</sub><br>L | Data collection: June–August/2001–<br>2017                   |                           | In-situ measure                         | +1                       | [23] |



|                       |     |                        | 14 periods/2001–<br>2017                                                                                  | July/2007–2017            |                 |                                             |      |
|-----------------------|-----|------------------------|-----------------------------------------------------------------------------------------------------------|---------------------------|-----------------|---------------------------------------------|------|
| Birmingham (UK)       | Cfb | UHI <sub>surf</sub>    | July/2006                                                                                                 | June–<br>August/2000–2013 | Remote sensing  | +0.76                                       | [4]  |
| Birmingham (UK)       | Cfb | UHI <sub>surf</sub>    | 18/July/2006                                                                                              | June–<br>August/2003–2009 | Remote sensing  | +                                           | [24] |
| Cardiff (UK)          | Cfb | UHI <sub>surf</sub>    | July/2006                                                                                                 | June–<br>August/2000–2013 | Remote sensing  | +0.58                                       | [4]  |
| Edinburgh (UK)        | Cfb | UHI <sub>surf</sub>    | July/2006                                                                                                 | June–<br>August/2000–2013 | Remote sensing  | +0.67                                       | [4]  |
| Glasgow (UK)          | Cfb | UHI <sub>surf</sub>    | July/2006                                                                                                 | June–<br>August/2000–2013 | Remote sensing  | +0.10                                       | [4]  |
| Leicester (UK)        | Cfb | UHI <sub>surf</sub>    | July/2006                                                                                                 | June–<br>August/2000–2013 | Remote sensing  | +0.42                                       | [4]  |
| Liverpool (UK)        | Cfb | UHI <sub>surf</sub>    | July/2006                                                                                                 | June–<br>August/2000–2013 | Remote sensing  | +0.55                                       | [4]  |
| London (UK)           | Cfb | UHI <sub>surf</sub>    | July/2006                                                                                                 | June–<br>August/2000–2013 | Remote sensing  | +0.67                                       | [4]  |
| Sheffield (UK)        | Cfb | UHI <sub>surf</sub>    | July/2006                                                                                                 | June–<br>August/2000–2013 | Remote sensing  | +1.05                                       | [4]  |
| Stoke-on-trent (UK)   | Cfb | UHI <sub>surf</sub>    | July/2006                                                                                                 | June–<br>August/2000–2013 | Remote sensing  | +0.28                                       | [4]  |
| Wolver-hampton (UK)   | Cfb | UHI <sub>surf</sub>    | July/2006                                                                                                 | June–<br>August/2000–2013 | Remote sensing  | +0.47                                       | [4]  |
| Melbourne (Australia) | Cfb | UHI <sub>UC</sub><br>L | Data collection: November–<br>March/January 1995–March 2014<br>Data collection: June–August/2001–<br>2015 |                           | In-situ measure | +1.4                                        | [25] |
| Cluj-Napoca (Romania) | Cfb | UHI <sub>surf</sub>    | HW days: 7&23/July/2015,<br>8/August/2015                                                                 |                           | Remote sensing  | + (extremely<br>severe HW)<br>0 (severe HW) | [26] |
| Cluj-Napoca (Romania) | Cfb | UHI <sub>surf</sub>    | July/2006                                                                                                 | June–<br>August/2000–2013 | Remote sensing  | +0.30                                       | [4]  |

|                            |     |                     |           |                           |                |       |     |
|----------------------------|-----|---------------------|-----------|---------------------------|----------------|-------|-----|
| Apeldoorn<br>(Netherlands) | Cfb | UHI <sub>surf</sub> | July/2006 | June–<br>August/2000–2013 | Remote sensing | +0.99 | [4] |
| Rotterdam<br>(Netherlands) | Cfb | UHI <sub>surf</sub> | July/2006 | June–<br>August/2000–2013 | Remote sensing | +0.83 | [4] |
| Berlin (Germany)           | Cfb | UHI <sub>surf</sub> | July/2006 | June–<br>August/2000–2013 | Remote sensing | +0.81 | [4] |
| Darmstadt<br>(Germany)     | Cfb | UHI <sub>surf</sub> | July/2006 | June–August/2000–<br>2013 | Remote sensing | +0.32 | [4] |
| Dresden<br>(Germany)       | Cfb | UHI <sub>surf</sub> | July/2006 | June–<br>August/2000–2013 | Remote sensing | +0.61 | [4] |
| Erfurt (Germany)           | Cfb | UHI <sub>surf</sub> | July/2006 | June–<br>August/2000–2013 | Remote sensing | +0.75 | [4] |
| Freiburg iB<br>(Germany)   | Cfb | UHI <sub>surf</sub> | July/2006 | June–<br>August/2000–2013 | Remote sensing | +0.71 | [4] |
| Hamburg<br>(Germany)       | Cfb | UHI <sub>surf</sub> | July/2006 | June–<br>August/2000–2013 | Remote sensing | +0.96 | [4] |
| Hannover<br>(Germany)      | Cfb | UHI <sub>surf</sub> | July/2006 | June–<br>August/2000–2013 | Remote sensing | +0.49 | [4] |
| Koln (Germany)             | Cfb | UHI <sub>surf</sub> | July/2006 | June–<br>August/2000–2013 | Remote sensing | +0.60 | [4] |
| Leipzig<br>(Germany)       | Cfb | UHI <sub>surf</sub> | July/2006 | June–<br>August/2000–2013 | Remote sensing | +0.51 | [4] |
| Munchen<br>(Germany)       | Cfb | UHI <sub>surf</sub> | July/2006 | June–<br>August/2000–2013 | Remote sensing | +0.35 | [4] |
| Nurnberg<br>(Germany)      | Cfb | UHI <sub>surf</sub> | July/2006 | June–<br>August/2000–2013 | Remote sensing | +0.26 | [4] |
| Stuttgart<br>(Germany)     | Cfb | UHI <sub>surf</sub> | July/2006 | June–August/2000–<br>2013 | Remote sensing | +0.21 | [4] |
| Trier (Germany)            | Cfb | UHI <sub>surf</sub> | July/2006 | June–August/2000–<br>2013 | Remote sensing | +0.57 | [4] |
| Wuppertal<br>(Germany)     | Cfb | UHI <sub>surf</sub> | July/2006 | June–<br>August/2000–2013 | Remote sensing | +0.56 | [4] |

|                        |     |                                |                            |                       |                                         |       |      |
|------------------------|-----|--------------------------------|----------------------------|-----------------------|-----------------------------------------|-------|------|
| Bydgoszcz (Poland)     | Cfb | UHI <sub>surf</sub>            | July/2006                  | June–August/2000–2013 | Remote sensing                          | +0.75 | [4]  |
| Kalisz (Poland)        | Cfb | UHI <sub>surf</sub>            | July/2006                  | June–August/2000–2013 | Remote sensing                          | +0.19 | [4]  |
| Krakow (Poland)        | Cfb | UHI <sub>surf</sub>            | July/2006                  | June–August/2000–2013 | Remote sensing                          | +0.56 | [4]  |
| Olsztyn (Poland)       | Cfb | UHI <sub>surf</sub>            | July/2006                  | June–August/2000–2013 | Remote sensing                          | +0.37 | [4]  |
| Poznan (Poland)        | Cfb | UHI <sub>surf</sub>            | July/2006                  | June–August/2000–2013 | Remote sensing                          | +0.74 | [4]  |
| Szczecin (Poland)      | Cfb | UHI <sub>surf</sub>            | July/2006                  | June–August/2000–2013 | Remote sensing                          | +1.05 | [4]  |
| Warszawa (Poland)      | Cfb | UHI <sub>surf</sub>            | July/2006                  | June–August/2000–2013 | Remote sensing                          | +0.41 | [4]  |
| Wroclaw (Poland)       | Cfb | UHI <sub>surf</sub>            | July/2006                  | June–August/2000–2013 | Remote sensing                          | +0.66 | [4]  |
| Zielona Gora (Poland)  | Cfb | UHI <sub>surf</sub>            | July/2006                  | June–August/2000–2013 | Remote sensing                          | +0.53 | [4]  |
| Goteborg (Sweden)      | Cfb | UHI <sub>surf</sub>            | July/2006                  | June–August/2000–2013 | Remote sensing                          | +1.18 | [4]  |
| Kobenhavn (Denmark)    | Cfb | UHI <sub>surf</sub>            | July/2006                  | June–August/2000–2013 | Remote sensing                          | +0.40 | [4]  |
| Namur (Belgium)        | Cfb | UHI <sub>surf</sub>            | July/2006                  | June–August/2000–2013 | Remote sensing                          | +0.53 | [4]  |
| Brussels (Belgium)     | Cfb | UHI <sub>UC</sub> <sub>L</sub> | Data collection: 1981–2010 |                       | In-situ measure<br>Numerical simulation | +     | [27] |
| Plzen (Czech Republic) | Cfb | UHI <sub>surf</sub>            | July/2006                  | June–August/2000–2013 | Remote sensing                          | +0.42 | [4]  |
| Praha (Czech Republic) | Cfb | UHI <sub>surf</sub>            | July/2006                  | June–August/2000–2013 | Remote sensing                          | +0.80 | [4]  |
| Sofia (Bulgaria)       | Cfb | UHI <sub>surf</sub>            | July/2006                  | June–August/2000–2013 | Remote sensing                          | +0.17 | [4]  |

|                         |     |                                               |                                                                                                     |                           |                                   |                          |      |
|-------------------------|-----|-----------------------------------------------|-----------------------------------------------------------------------------------------------------|---------------------------|-----------------------------------|--------------------------|------|
| Wien (Austria)          | Cfb | UHI <sub>surf</sub>                           | July/2006                                                                                           | June–<br>August/2000–2013 | Remote sensing                    | +0.44                    | [4]  |
| Adelaide<br>(Australia) | Csa | UHI <sub>UC</sub><br>L                        | Data collection: November–<br>March/January 1995–March 2014                                         |                           | In-situ measure                   | +1.2                     | [25] |
| Perth (Australia)       | Csa | UHI <sub>UC</sub><br>L                        | Data collection: November–<br>March/January 1995–March 2014                                         |                           | In-situ measure                   | –1.3                     | [25] |
| Lisbon (Portugal)       | Csa | UHI <sub>UC</sub><br>L                        | Data collection: June–September/2004–<br>2015<br>HW days: 49                                        |                           | In-situ measure                   | 0                        | [28] |
| Madrid (Spain)          | Csa | UHI <sub>surf</sub><br>UHI <sub>UC</sub><br>L | Data collection: summer 2002–2017<br>(UHI <sub>surf</sub> ), summer 1980–2017 (UHI <sub>UCL</sub> ) |                           | Remote sensing<br>In-situ measure | +                        | [29] |
| Madrid (Spain)          | Csa | UHI <sub>surf</sub>                           | July/2006                                                                                           | June–<br>August/2000–2013 | Remote sensing                    | +0.18                    | [4]  |
| Barcelona (Spain)       | Csa | UHI <sub>surf</sub>                           | July/2006                                                                                           | June–<br>August/2000–2013 | Remote sensing                    | +0.02                    | [4]  |
| Sevilla (Spain)         | Csa | UHI <sub>surf</sub>                           | July/2006                                                                                           | June–<br>August/2000–2013 | Remote sensing                    | +0.10                    | [4]  |
| Athens (Greece)         | Csa | UHI <sub>UC</sub><br>L                        | Data collection: July–August 2012                                                                   |                           | In-situ measure<br>Remote sensing | +3.5                     | [20] |
| Athens (Greece)         | Csa | UHI <sub>UC</sub><br>L                        | Data collection: 1970–2004                                                                          |                           | In-situ measure                   | +                        | [30] |
| Irakleio (Greece)       | Csa | UHI <sub>surf</sub>                           | July/2006                                                                                           | June–<br>August/2000–2013 | Remote sensing                    | +0.11                    | [4]  |
| Marseille<br>(France)   | Csa | UHI <sub>surf</sub>                           | July/2006                                                                                           | June–<br>August/2000–2013 | Remote sensing                    | +0.20                    | [4]  |
| Napoli (Italy)          | Csa | UHI <sub>surf</sub>                           | July/2006                                                                                           | June–<br>August/2000–2013 | Remote sensing                    | +0.16                    | [4]  |
| Roma (Italy)            | Csa | UHI <sub>surf</sub>                           | July/2006                                                                                           | June–<br>August/2000–2013 | Remote sensing                    | +0.33                    | [4]  |
| Bhopal (India)          | Csa | UHI <sub>surf</sub>                           | Data collection: April–June/2003–2016                                                               |                           | Remote sensing                    | + (daytime)<br>– (night) | [2]  |

|                         |     |                     |                                        |                |                          |     |
|-------------------------|-----|---------------------|----------------------------------------|----------------|--------------------------|-----|
| Jabalpur (India)        | Csa | UHI <sub>surf</sub> | Data collection: April–June/2003–2016  | Remote sensing | –                        | [2] |
| Oviedo (Spain)          | Csb | UHI <sub>surf</sub> | July/2006<br>June–<br>August/2000–2013 | Remote sensing | +0.11                    | [4] |
| Durgapur (India)        | Cwa | UHI <sub>surf</sub> | Data collection: April–June/2003–2016  | Remote sensing | + (daytime)<br>– (night) | [2] |
| Ranchi (India)          | Cwa | UHI <sub>surf</sub> | Data collection: April–June/2003–2016  | Remote sensing | –                        | [2] |
| Allahabad (India)       | Cwa | UHI <sub>surf</sub> | Data collection: April–June/2003–2016  | Remote sensing | + (daytime)<br>– (night) | [2] |
| Bhagalpur (India)       | Cwa | UHI <sub>surf</sub> | Data collection: April–June/2003–2016  | Remote sensing | –                        | [2] |
| Bihar_sharif<br>(India) | Cwa | UHI <sub>surf</sub> | Data collection: April–June/2003–2016  | Remote sensing | + (daytime)<br>– (night) | [2] |
| Dehradun<br>(India)     | Cwa | UHI <sub>surf</sub> | Data collection: April–June/2003–2016  | Remote sensing | + (daytime)<br>– (night) | [2] |
| Dhanbad (India)         | Cwa | UHI <sub>surf</sub> | Data collection: April–June/2003–2016  | Remote sensing | – (daytime)<br>+ (night) | [2] |
| Faizabad (India)        | Cwa | UHI <sub>surf</sub> | Data collection: April–June/2003–2016  | Remote sensing | –                        | [2] |
| Gaya (India)            | Cwa | UHI <sub>surf</sub> | Data collection: April–June/2003–2016  | Remote sensing | –                        | [2] |
| Goalpara (India)        | Cwa | UHI <sub>surf</sub> | Data collection: April–June/2003–2016  | Remote sensing | +                        | [2] |
| Guwahati (India)        | Cwa | UHI <sub>surf</sub> | Data collection: April–June/2003–2016  | Remote sensing | +                        | [2] |
| Haridwar (India)        | Cwa | UHI <sub>surf</sub> | Data collection: April–June/2003–2016  | Remote sensing | –                        | [2] |
| Kanpur (India)          | Cwa | UHI <sub>surf</sub> | Data collection: April–June/2003–2016  | Remote sensing | + (daytime)<br>– (night) | [2] |
| Lucknow (India)         | Cwa | UHI <sub>surf</sub> | Data collection: April–June/2003–2016  | Remote sensing | –                        | [2] |
| Muzaffarpur<br>(India)  | Cwa | UHI <sub>surf</sub> | Data collection: April–June/2003–2016  | Remote sensing | –                        | [2] |
| Patna (India)           | Cwa | UHI <sub>surf</sub> | Data collection: April–June/2003–2016  | Remote sensing | –                        | [2] |
| Roorkee (India)         | Cwa | UHI <sub>surf</sub> | Data collection: April–June/2003–2016  | Remote sensing | + (daytime)<br>– (night) | [2] |
| Tangla (India)          | Cwa | UHI <sub>surf</sub> | Data collection: April–June/2003–2016  | Remote sensing | +                        | [2] |
| Tinsukia (India)        | Cwa | UHI <sub>surf</sub> | Data collection: April–June/2003–2016  | Remote sensing | +                        | [2] |
| Amritsar (India)        | Cwa | UHI <sub>surf</sub> | Data collection: April–June/2003–2016  | Remote sensing | –                        | [2] |
| Jalandhar (India)       | Cwa | UHI <sub>surf</sub> | Data collection: April–June/2003–2016  | Remote sensing | + (daytime)<br>– (night) | [2] |

|                             |     |                        |                                              |                                              |                                         |                            |      |
|-----------------------------|-----|------------------------|----------------------------------------------|----------------------------------------------|-----------------------------------------|----------------------------|------|
| Ludhiana (India)            | Cwa | UHI <sub>surf</sub>    | Data collection: April–June/2003–2016        |                                              | Remote sensing                          | + (daytime)<br>– (night)   | [2]  |
| Panipat (India)             | Cwa | UHI <sub>surf</sub>    | Data collection: April–June/2003–2016        |                                              | Remote sensing                          | + (daytime)<br>– (night)   | [2]  |
| Patiala (India)             | Cwa | UHI <sub>surf</sub>    | Data collection: April–June/2003–2016        |                                              | Remote sensing                          | + (daytime)<br>– (night)   | [2]  |
| Madison (USA)               | Dfa | UHI <sub>UC</sub><br>L | Data collection: summer 2012                 |                                              | In-situ measure                         | +                          | [31] |
| Chicago (USA)               | Dfa | UHI <sub>UC</sub><br>L | 12–15 July 1995                              |                                              | In-situ measure                         | 0                          | [32] |
| Rochester (USA)             | Dfa | UHI <sub>UC</sub><br>L | 16–18/July/2006<br>1–3/August/2006           | 13–15&19–31/July<br>/2006<br>4–9/August/2006 | Numerical simulation                    | 0                          | [15] |
| Budapest<br>(Hungary)       | Dfb | UHI <sub>surf</sub>    | July/2006                                    | June–<br>August/2000–2013                    | Remote sensing                          | +0.46                      | [4]  |
| Rzeszow<br>(Poland)         | Dfb | UHI <sub>surf</sub>    | July/2006                                    | June–<br>August/2000–2013                    | Remote sensing                          | +0.35                      | [4]  |
| Vilnius<br>(Lithuania)      | Dfb | UHI <sub>surf</sub>    | July/2006                                    | June–<br>August/2000–2013                    | Remote sensing                          | +0.68                      | [4]  |
| Seoul (South<br>Korea)      | Dwa | UHI <sub>UC</sub><br>L | Data collection: May–<br>September/2012&2016 |                                              | In-situ measure                         | +3.3 (2012)<br>+4.5 (2016) | [33] |
| Seoul (South<br>Korea)      | Dwa | UHI <sub>UC</sub><br>L | Data collection: 1962–2017<br>179 days       | 4870 days (June–<br>August)                  | In-situ measure                         | + 0.9                      | [34] |
| Beijing (China<br>Mainland) | Dwa | UHI <sub>UC</sub><br>L | 9–14/July/2017                               | 3–8&15–<br>20/July/2017                      | Numerical simulation<br>In-situ measure | +0.78                      | [35] |
| Beijing (China<br>Mainland) | Dwa | UHI <sub>UC</sub><br>L | 9–13/July/2017                               | 1–8&14–<br>31/July/2017                      | In-situ measure<br>Remote sensing       | +                          | [36] |
| Beijing (China<br>Mainland) | Dwa | UHI <sub>UC</sub><br>L | Data collection: June–August/2013–<br>2015   |                                              | In-situ measure                         | +0.9                       | [11] |
| Beijing (China<br>Mainland) | Dwa | UHI <sub>UC</sub><br>L | Data collection: 26/June–31/July/2015        |                                              | Numerical Simulation                    | +                          | [37] |

|                          |     |                            |                                                                           |                      |   |      |
|--------------------------|-----|----------------------------|---------------------------------------------------------------------------|----------------------|---|------|
| Beijing (China Mainland) | Dwa | $UHI_{surf}$               | Data collection: June–August/2000&2010                                    | Numerical Simulation | + | [38] |
| Beijing (China Mainland) | Dwa | $UHI_{UC}$<br><sub>L</sub> | Data collection: 2009–2010                                                | In-situ measure      | + | [39] |
| Beijing (China Mainland) | Dwa | $UHI_{UC}$<br><sub>L</sub> | Data collection: June–August/2009–2010<br>HW days: 44    Non-HW days: 140 | In-situ measure      | + | [40] |

**Table S2.** Summary of studies investigating energy budget changes and relevant drivers.

| City      | HM | $Q^*$                                                                                           | $Q_F$                                                                            | $Q_H$                                                           | $Q_E$                                                               | $\Delta Q_S$ | $\Delta Q_A$ | Drivers            | Ref  |
|-----------|----|-------------------------------------------------------------------------------------------------|----------------------------------------------------------------------------------|-----------------------------------------------------------------|---------------------------------------------------------------------|--------------|--------------|--------------------|------|
| Beijing   | +  | increase in $K \downarrow$ and $L \downarrow$ at urban site are larger than those at rural site | not measure                                                                      | urban: increase<br>rural: decrease                              | increase in $Q_E$ at urban site are smaller than that at rural site | not measure  | not consider | evapotranspiration | [39] |
| Shanghai  | +  | urban: +128 W/m <sup>2</sup><br>suburban: +115 W/m <sup>2</sup>                                 | urban: +20 W/m <sup>2</sup> (daytime)<br>suburban: +3 W/m <sup>2</sup> (daytime) | urban: +140 W/m <sup>2</sup><br>suburban: +100 W/m <sup>2</sup> | urban: - 2 W/m <sup>2</sup><br>suburban: + 2 W/m <sup>2</sup>       | not measure  | not consider | see breeze         | [10] |
| Singapore | 0  | urban: +170 W/m <sup>2</sup><br>rural: +100 W/m <sup>2</sup>                                    | assume to be unchanged                                                           | urban: increase                                                 | rural: increase                                                     | no change    | not measure  | NA                 | [1]  |
| Brussel   | +  | increase                                                                                        | not measure                                                                      | urban: +72 W/m <sup>2</sup><br>suburban: +55 W/m <sup>2</sup>   | increase                                                            | increase     | not measure  | humidity           | [27] |



**Table S3.** Summary of the reviewed studies related to mitigation solutions of UHI in HWs.

| Location                                            | Climat<br>e | UHI Type                                  | Period                                                  | Mitigation solution                                                                                                         | Temperature (K)                                                                                                                                                   | Ref  |
|-----------------------------------------------------|-------------|-------------------------------------------|---------------------------------------------------------|-----------------------------------------------------------------------------------------------------------------------------|-------------------------------------------------------------------------------------------------------------------------------------------------------------------|------|
| Phoenix (USA)                                       | BWh         | UHI <sub>UCL</sub>                        | 1981–2010&2041–2100                                     | Cool roof (albedo=0.88)                                                                                                     | –0.66                                                                                                                                                             | [41] |
| Phoenix (USA)                                       | BWh         | UHI <sub>UCL</sub>                        | 27/July–6/August/2006                                   | Cool roof (albedo:<br>0.3→0.7)<br>Green roof<br>(evapotranspiration×1.5)                                                    | –1.5                                                                                                                                                              | [6]  |
| Sydney (Australia)                                  | Cfa         | UHI <sub>UCL</sub>                        | January–February/2017                                   | Irrigation                                                                                                                  | –1.3 (Max)<br>–0.5 (Ave)                                                                                                                                          | [42] |
| Atlanta (USA)                                       | Cfa         | UHI <sub>UCL</sub>                        | 1981–2010&2041–2100                                     | Cool roof (albedo=0.88)                                                                                                     | –0.38                                                                                                                                                             | [41] |
| Atlanta (USA)                                       | Cfa         | UHI <sub>UCL</sub>                        | 16/August/2007                                          | Albedo (0.15→0.3,<br>0.15→0.45)<br>Vegetation<br>Albedo + Vegetation                                                        | 0 (double albedo)<br>–1~2 (triple albedo)<br>–7 (double<br>vegetation)<br>–1 (double albedo<br>and vegetation)<br>–1 (surface, 30%<br>green roof or cool<br>roof) | [17] |
| Baltimore–Washingt<br>on metropolitan area<br>(USA) | Cfa         | UHI <sub>UCL</sub><br>UHI <sub>surf</sub> | 7–10/June/2008                                          | Cool roof (Albedo:<br>0.3→0.7)<br>Green roof                                                                                | –0.5 (air, 90% green<br>roof or 95% cool<br>roof)                                                                                                                 | [43] |
| Houston (USA)                                       | Cfa         | UHI <sub>UCL</sub>                        | 17–23/July/2011                                         | Albedo (roof, wall, road:<br>0.2→0.45→0.6→0.65)<br>Cool roof (albedo:<br>0.3→0.7)<br>Green roof<br>(evapotranspiration×1.5) | –3                                                                                                                                                                | [44] |
| New York City<br>(USA)                              | Cfa         | UHI <sub>UCL</sub>                        | 15–31/July/2006                                         |                                                                                                                             | –2.5                                                                                                                                                              | [6]  |
| Kansas City (USA)                                   | Cfa         | UHI <sub>UCL</sub>                        | 16–21/July/2011<br>19–24/July/2012<br>24–30/August/2013 | Green space                                                                                                                 | –0.5~1                                                                                                                                                            | [45] |

|                                                 |     |                                           |                                     |                                                                                                                                                                                                                                                                                                                                                                                                       |                                                                                                     |      |
|-------------------------------------------------|-----|-------------------------------------------|-------------------------------------|-------------------------------------------------------------------------------------------------------------------------------------------------------------------------------------------------------------------------------------------------------------------------------------------------------------------------------------------------------------------------------------------------------|-----------------------------------------------------------------------------------------------------|------|
| Milan (Italy)                                   | Cfa | UHI <sub>UCL</sub>                        | 14–23/July/2015                     | Albedo (roof, road and wall: 0.2→0.7; only roof: 0.2→0.7)                                                                                                                                                                                                                                                                                                                                             | –2 (roof, road and wall)                                                                            | [9]  |
| Suzhou-Wuxi-Changzhou metropolitan area (China) | Cfa | UHI <sub>UCL</sub>                        | 6–8/August/2013                     | Cool roof<br>Green roof                                                                                                                                                                                                                                                                                                                                                                               | –2.2                                                                                                | [46] |
| Nanjing (China)                                 | Cfa | UHI <sub>UCL</sub><br>UHI <sub>surf</sub> | 6–10/August/2013                    | Urban hydrological processes<br>(anthropogenic latent heat, urban oasis effect, urban irrigation, evaporation from paved surfaces, green roofs)<br>Albedo (roof: 0.15→0.8, wall: 0.25→0.45, road: 0.08→0.3)<br>Vegetation and wet areas (forest: +1400 km <sup>2</sup> , wet areas: +300 km <sup>2</sup> )<br>Vegetation watering, Pavement watering, combination of vegetation and pavement watering | –1.3 (max, air)<br>–10 (max, surface)<br><br>–1 (albedo)<br>–2~3 (albedo, vegetation and wet areas) | [47] |
| Paris (France)                                  | Cfb | UHI <sub>UCL</sub>                        | 2008&2030 based on 2003 HW          |                                                                                                                                                                                                                                                                                                                                                                                                       |                                                                                                     | [48] |
| Paris (France)                                  | Cfb | UHI <sub>UCL</sub>                        | HW in 2100                          |                                                                                                                                                                                                                                                                                                                                                                                                       | –0.8 (daytime)<br>–2.6 (night)                                                                      | [49] |
| Birmingham (UK)                                 | Cfb | UHI <sub>UCL</sub>                        | 2–10/August/2003<br>16–27/July/2006 | Cool roof (albedo: 0.2→0.7)                                                                                                                                                                                                                                                                                                                                                                           | –0.5 (Ave)<br>–3 (Max)                                                                              | [50] |
| Stuttgart (Germany)                             | Cfb | UHI <sub>UCL</sub>                        | 9–18/August/2003                    | Albedo (0.2→0.7)<br>Vegetation (12%→80%)                                                                                                                                                                                                                                                                                                                                                              | –1.2 (Albedo)<br>–1.3 (Vegetation)                                                                  | [51] |
| Munich (Germany)                                | Cfb | UHI <sub>surf</sub>                       | June–August/2002–2012               | Vegetation<br>Green roof                                                                                                                                                                                                                                                                                                                                                                              | –<br>UHI: –3.8 (green roof)                                                                         | [52] |
| Melbourne (Australia)                           | Cfb | UHI <sub>UCL</sub><br>UHI <sub>surf</sub> | 27–30/January/2009                  | (0→30%→50%→70%→90%)                                                                                                                                                                                                                                                                                                                                                                                   | UHI: –5.2 (cool roof)                                                                               | [53] |

|                                                        |                   |                                           |                                                                                                                    |                                                               |                                                           |      |
|--------------------------------------------------------|-------------------|-------------------------------------------|--------------------------------------------------------------------------------------------------------------------|---------------------------------------------------------------|-----------------------------------------------------------|------|
|                                                        |                   |                                           |                                                                                                                    | Cool roof<br>(0.2→0.5→0.7→0.85)                               |                                                           |      |
|                                                        |                   |                                           |                                                                                                                    | Mixed forest                                                  | MF: -0.6~3.4 (air),<br>-0.8~4.2 (surface)                 |      |
|                                                        |                   |                                           |                                                                                                                    | Mixed forest and<br>grasslands                                | MFAG: -0.6~3.7<br>(air),                                  | [54] |
| Melbourne<br>(Australia)                               | Cfb               | UHI <sub>UCL</sub><br>UHI <sub>surf</sub> | 27–30/January/2009                                                                                                 | Mixed shrublands and<br>grasslands<br>(0→20%→30%→40%→50<br>%) | MSAG: -0.4~3 (air)<br>-0.8~3.7 (surface)                  |      |
| Sacramento (USA)                                       | Csa               | UHI <sub>UCL</sub>                        | 17–23/July/2011                                                                                                    | Albedo (roof, wall, road:<br>0.2→0.45→0.6→0.65)               | -2.5                                                      | [44] |
| Athens (Greece)                                        | Csa               | UHI <sub>UCL</sub>                        | 24–26/July/2009                                                                                                    | Albedo                                                        | –                                                         | [55] |
| Terni (Italy)                                          | Csa               | UHI <sub>UCL</sub>                        | 17–19/July/2015                                                                                                    | Albedo (roof, wall, road:<br>0.2→0.8)                         | -2.5 (max)                                                | [56] |
| Detroit (USA)                                          | Dfa               | UHI <sub>UCL</sub>                        | 1981–2010&2041–2100                                                                                                | Cool roof (albedo=0.88)                                       | -0.42                                                     | [41] |
| Chicago (USA)                                          | Dfa               | UHI <sub>UCL</sub>                        | 17–23/July/2011                                                                                                    | Albedo (roof, wall, road:<br>0.2→0.45→0.6→0.65)               | -2                                                        | [44] |
| Prague (Czech<br>Republic)                             | Dfb               | UHI <sub>UCL</sub>                        | 01/August/2017                                                                                                     | Albedo (+0.25, +0.5)<br>Trees (+30%)                          | -0.2 (albedo+0.25)<br>-0.5 (albedo+0.5)<br>-0.2~0 (trees) | [57] |
| Brno (Czech<br>Republic)                               | Dfb               | UHI <sub>UCL</sub>                        | 01/August/2017                                                                                                     | Albedo (+0.25, +0.5)<br>Trees (+30%)                          | -0.2 (albedo+0.25)<br>-0.4 (albedo+0.5)<br>-0.2~0 (trees) | [57] |
| Toronto (Canda)                                        | Dfb               | UHI <sub>UCL</sub><br>UHI <sub>surf</sub> | 2–5/July/2018                                                                                                      | Albedo (roof, wall, road:<br>0.2→0.45→0.6→0.65)               | -2 (max, air)<br>-5 (max, surface)                        | [58] |
| Montreal (Canada)                                      | Dfb               | UHI <sub>UCL</sub><br>UHI <sub>surf</sub> | 10–12/July/2005                                                                                                    | Albedo (roof, wall, road:<br>0.2→0.45→0.6→0.65)               | -1 (max, air)<br>-4 (max, surface)                        | [59] |
| Beijing-Tianjin-<br>Hebei metropolitan<br>area (China) | BSk<br>Cwa<br>Dwa | UHI <sub>UCL</sub>                        | 1–5/June/2001, 11–<br>16/July/2002, 20–<br>24/June/2005, 4–<br>6/July/2005, 23–<br>27/June/2009, 2–<br>6/July/2010 | White roof (albedo:<br>0.12→0.85)                             | -0.51 (Ave)<br>-0.8 (Max)                                 | [60] |

|                                                            |             |                                           |                                                        |                                             |                                    |      |
|------------------------------------------------------------|-------------|-------------------------------------------|--------------------------------------------------------|---------------------------------------------|------------------------------------|------|
| Beijing (China)                                            | Dwa         | UHI <sub>UCL</sub><br>UHI <sub>surf</sub> | 13–15/July/2002                                        | Cool roof (albedo:<br>0.15→0.8)             | –1~6.2 (surface)<br>–0.4~1.5 (air) | [61] |
| Beijing (China)                                            | Dwa         | UHI <sub>UCL</sub>                        | 1–30/July2015                                          | Albedo (roof, wall, road:<br>0.2→0.85)      | UHI: 2.01→1.41                     | [37] |
| Beijing (China)                                            | Dwa         | UHI <sub>UCL</sub>                        | 3–7/July/2010                                          | Green roof (0, 10%, 20%,<br>50%, 80%, 100%) | –2.5 (max)                         | [62] |
| Beijing (China), Łódź<br>(Poland), London,<br>Swindon (UK) | Dwa,<br>Cfb | UHI <sub>surf</sub>                       | June–August/2001–2002<br>or 2009–2010 or 2011–<br>2012 | Albedo<br>Vegetaion                         | –                                  | [63] |

---

## References

1. Chew, L.W.; Liu, X.; Li, X.-X.; Norford, L.K. Interaction between heat wave and urban heat island: A case study in a tropical coastal city, Singapore. *Atmos. Res.* **2021**, *247*, 105134..
2. Kumar, R.; Mishra, V. Decline in surface urban heat island intensity in India during heatwaves. *Environ. Res. Commun.* **2019**, *1*, 031001, doi:10.1088/2515-7620/ab121d.
3. Pyrgou, A.; Hadjinicolaou, P.; Santamouris, M. Urban-rural moisture contrast: Regulator of the urban heat island and heatwaves' synergy over a mediterranean city. *Environ. Res.* **2020**, *182*, 109102, doi:10.1016/j.envres.2019.109102.
4. Ward, K.; Lauf, S.; Kleinschmit, B.; Endlicher, W. Heat waves and urban heat islands in Europe: A review of relevant drivers. *Sci. Total. Environ.* **2016**, *569*, 527–539.
5. Rizvi, S.H.; K. Alam, and M.J. Iqbal, Spatio-temporal variations in urban heat island and its interaction with heat wave. *Journal of Atmospheric and Solar-Terrestrial Physics*, **2019**. 185: p. 50-57.
6. Tewari, M.; Yang, J.; Kusaka, H.; Salamanca, F.; Watson, C.; Treinish, L. Interaction of urban heat islands and heat waves under current and future climate conditions and their mitigation using green and cool roofs in New York City and Phoenix, Arizona. *Environ. Res. Lett.* **2019**, *14*, 034002, doi:10.1088/1748-9326/aaf431.
7. Khan, H.S.; Paolini, R.; Santamouris, M.; Caccetta, P. Exploring the Synergies between Urban Overheating and Heatwaves (HWs) in Western Sydney. *Energies* **2020**, *13*, 470, doi:10.3390/en13020470.
8. Unger, J.; Skarbit, N.; Kovács, A.; Gál, T. Comparison of regional and urban outdoor thermal stress conditions in heatwave and normal summer periods: A case study. *Urban Clim.* **2020**, *32*, 100619, doi:10.1016/j.uclim.2020.100619.
9. Falasca, S.; Ciancio, V.; Salata, F.; Golasi, I.; Rosso, F.; Curci, G. High albedo materials to counteract heat waves in cities: An assessment of meteorology, buildings energy needs and pedestrian thermal comfort. *Build. Environ.* **2019**, *163*, 106242, doi:10.1016/j.buildenv.2019.106242.
10. Ao, X.; Wang, L.; Zhi, X.; Gu, W.; Yang, H.; Li, D. Observed Synergies between Urban Heat Islands and Heat Waves and Their Controlling Factors in Shanghai, China. *J. Appl. Meteorol. Climatol.* **2019**, *58*, 1955–1972, doi:10.1175/jamc-d-19-0073.1.
11. Jiang, S.; Lee, X.; Wang, J.; Wang, K. Amplified Urban Heat Islands during Heat Wave Periods. *J. Geophys. Res. Atmos.* **2019**, *124*, 7797–7812, doi:10.1029/2018jd030230.
12. Ortiz, L.E.; Gonzalez, J.E.; Wu, W.; Schoonen, M.; Tongue, J.; Bornstein, R. New York City Impacts on a Regional Heat Wave. *J. Appl. Meteorol. Climatol.* **2018**, *57*, 837–851, doi:10.1175/jamc-d-17-0125.1.
13. Ramamurthy, P.; Gonzalez, J.; Ortiz, L.; Arend, M.; Moshary, F. Impact of heatwave on a megacity: An observational analysis of New York City during July 2016. *Environ. Res. Lett.* **2017**, *12*, 054011.
14. Ramamurthy, P.; Li, D.; Bou-Zeid, E. High-resolution simulation of heatwave events in New York City. *Theor. Appl. Climatol.* **2017**, *128*, 89–102, doi:10.1007/s00704-015-1703-8.
15. Ramamurthy, P.; Bou-Zeid, E. Heatwaves and urban heat islands: A comparative analysis of multiple cities. *J. Geophys. Res. Atmos.* **2017**, *122*, 168–178, doi:10.1002/2016jd025357.
16. Li, D.; Bou-Zeid, E. Synergistic Interactions between Urban Heat Islands and Heat Waves: The Impact in Cities Is Larger than the Sum of Its Parts. *J. Appl. Meteorol. Climatol.* **2013**, *52*, 2051–2064, doi:10.1175/jamc-d-13-02.1.
17. Zhou, Y.; Shepherd, J.M. Atlanta's urban heat island under extreme heat conditions and potential mitigation strategies. *Nat. Hazards* **2010**, *52*, 639–668.
18. Basara, J.B., et al., The Impact of the Urban Heat Island during an Intense Heat Wave in Oklahoma City. *Advances in Meteorology*, **2010**. 2010: p. 1-10.
19. Wu, C.-D.; Lung, S.-C.C.; Jan, J.-F. Development of a 3-D urbanization index using digital terrain models for surface urban heat island effects. *ISPRS J. Photogramm. Remote. Sens.* **2013**, *81*, 1–11, doi:10.1016/j.isprsjprs.2013.03.009.
20. Founda, D.; Santamouris, M. Synergies between Urban Heat Island and Heat Waves in Athens (Greece), during an extremely hot summer (2012). *Sci. Rep.* **2017**, *7*, 10973, doi:10.1038/s41598-017-11407-6.
21. Richard, Y.; Pohl, B.; Rega, M.; Pergaud, J.; Thevenin, T.; Emery, J.; Dudek, J.; Vairet, T.; Zito, S.; Chateau-Smith, C. Is Urban Heat Island intensity higher during hot spells and heat waves (Dijon, France, 2014–2019)? *Urban Clim.* **2021**, *35*, 100747.
22. De Ridder, K.; Maiheu, B.; Lauwaet, D.; Daglis, I.; Keramitsoglou, I.; Kourtidis, K.; Manunta, P.; Paganini, M. Urban Heat Island Intensification during Hot Spells—The Case of Paris during the Summer of 2003. *Urban Sci.* **2017**, *1*, 3, doi:10.3390/urbansci1010003.
23. Nicholson, A. Analysis of the diurnal cycle of air temperature between rural Berkshire and the University of Reading: Possible role of the urban heat island. *Weather* **2020**, *75*, 235–241.
24. Tomlinson, C.J.; Chapman, L.; Thornes, J.E.; Baker, C.J. Derivation of Birmingham's summer surface urban heat island from MODIS satellite images. *Int. J. Climatol.* **2012**, *32*, 214–224, doi:10.1002/joc.2261.

25. Rogers, C.D.W.; Gallant, A.J.E.; Tapper, N.J. Is the urban heat island exacerbated during heatwaves in southern Australian cities? *Theor. Appl. Climatol.* **2019**, *137*, 441–457, doi:10.1007/s00704-018-2599-x.
26. Herbel, I.; Croitoru, A.-E.; Rus, A.V.; Roșca, C.F.; Harpa, G.V.; Ciupertea, A.-F.; Rus, I. The impact of heat waves on surface urban heat island and local economy in Cluj-Napoca city, Romania. *Theor. Appl. Climatol.* **2018**, *133*, 681–695, doi:10.1007/s00704-017-2196-4.
27. Hamdi, R.; Duchêne, F.; Berckmans, J.; Delcloo, A.; Vanpoucke, C.; Termonia, P. Evolution of urban heat wave intensity for the Brussels Capital Region in the ARPEGE-Climat A1B scenario. *Urban Climate* **2016**, *17*, 176–195, doi:10.1016/j.uclim.2016.08.001.
28. Oliveira, A.; Lopes, A.; Correia, E.; Niza, S.; Soares, A. Heatwaves and Summer Urban Heat Islands: A Daily Cycle Approach to Unveil the Urban Thermal Signal Changes in Lisbon, Portugal. *Atmosphere* **2021**, *12*, 292, doi:10.3390/atmos12030292.
29. Rasilla, D.; Allende, F.; Martilli, A.; Fernández, F. Heat Waves and Human Well-Being in Madrid (Spain). *Atmosphere* **2019**, *10*, 288, doi:10.3390/atmos10050288.
30. Founda, D.; Pierros, F.; Petrakis, M.; Zerefos, C. Interdecadal variations and trends of the Urban Heat Island in Athens (Greece) and its response to heat waves. *Atmos. Res.* **2015**, *161–162*, 1–13, doi:10.1016/j.atmosres.2015.03.016.
31. Schatz, J.; Kucharik, C.J. Urban climate effects on extreme temperatures in Madison, Wisconsin, USA. *Environ. Res. Lett.* **2015**, *10*, 094024, doi:10.1088/1748-9326/10/9/094024.
32. Kunkel, K.E.; Changnon, S.A.; Reinke, B.C.; Arritt, R.W. The July 1995 heat wave in the Midwest: A climatic perspective and critical weather factors. *Bull. Am. Meteorol. Soc.* **1996**, *77*, 1507–1518.
33. Ngarambe, J.; Nganyiyimana, J.; Kim, I.; Santamouris, M.; Yun, G.Y. Synergies between urban heat island and heat waves in Seoul: The role of wind speed and land use characteristics. *PLoS ONE* **2020**, *15*, e0243571, doi:10.1371/journal.pone.0243571.
34. Hong, J.W.; Hong, J.; Kwon, E.E.; Yoon, D.K. Temporal dynamics of urban heat island correlated with the socio-economic development over the past half-century in Seoul, Korea. *Environ. Pollut.* **2019**, *254*, 112934, doi:10.1016/j.envpol.2019.07.102.
35. He, X.; Wang, J.; Feng, J.; Yan, Z.; Miao, S.; Zhang, Y.; Xia, J. Observational and modeling study of interactions between urban heat island and heatwave in Beijing. *J. Clean. Prod.* **2020**, *247*, 119169, doi:10.1016/j.jclepro.2019.119169.
36. An, N.; Dou, J.; González-Cruz, J.E.; Bornstein, R.D.; Miao, S.; Li, L. An Observational Case Study of Synergies between an Intense Heat Wave and the Urban Heat Island in Beijing. *J. Appl. Meteorol. Climatol.* **2020**, *59*, 605–620, doi:10.1175/jamc-d-19-0125.1.
37. Chen, L.; Zhang, M.; Zhu, J.; Wang, Y.; Skorokhod, A. Modeling Impacts of Urbanization and Urban Heat Island Mitigation on Boundary Layer Meteorology and Air Quality in Beijing Under Different Weather Conditions. *J. Geophys. Res. Atmos.* **2018**, *123*, 4323–4344, doi:10.1002/2017jd027501.
38. Gao, Z.; Hou, Y.; Chen, W. Enhanced sensitivity of the urban heat island effect to summer temperatures induced by urban expansion. *Environ. Res. Lett.* **2019**, *14*, 094005, doi:10.1088/1748-9326/ab2740.
39. Li, D.; Sun, T.; Liu, M.; Yang, L.; Wang, L.; Gao, Z. Contrasting responses of urban and rural surface energy budgets to heat waves explain synergies between urban heat islands and heat waves. *Environ. Res. Lett.* **2015**, *10*, 054009, doi:10.1088/1748-9326/10/5/054009.
40. Li, D.; Sun, T.; Liu, M.; Wang, L.; Gao, Z. Changes in Wind Speed under Heat Waves Enhance Urban Heat Islands in the Beijing Metropolitan Area. *J. Appl. Meteorol. Climatol.* **2016**, *55*, 2369–2375, doi:10.1175/jamc-d-16-0102.1.
41. Broadbent, A.M.; Krayenhoff, E.S.; Georgescu, M. Efficacy of cool roofs at reducing pedestrian-level air temperature during projected 21st century heatwaves in Atlanta, Detroit, and Phoenix (USA). *Environ. Res. Lett.* **2020**, *15*, 084007, doi:10.1088/1748-9326/ab6a23.
42. Gao, K.; Santamouris, M.; Feng, J. On the cooling potential of irrigation to mitigate urban heat island. *Sci. Total. Environ.* **2020**, *740*, 139754.
43. Li, D.; Bou-Zeid, E.; Oppenheimer, M. The effectiveness of cool and green roofs as urban heat island mitigation strategies. *Environ. Res. Lett.* **2014**, *9*, 055002.
44. Jandaghian, Z.; Akbari, H. The Effect of Increasing Surface Albedo on Urban Climate and Air Quality: A Detailed Study for Sacramento, Houston, and Chicago. *Climate* **2018**, *6*, 19, doi:10.3390/cli6020019.
45. Cady, T.J.; Rahn, D.A.; Brunzell, N.A.; Lyles, W. Conversion of Abandoned Property to Green Space as a Strategy to Mitigate the Urban Heat Island Investigated with Numerical Simulations. *J. Appl. Meteorol. Climatol.* **2020**, *59*, 1827–1843, doi:10.1175/jamc-d-20-0093.1.
46. Chen, Y.; Zhang, N. Urban heat island mitigation effectiveness under extreme heat conditions in the Suzhou–Wuxi–Changzhou metropolitan area, China. *J. Appl. Meteorol. Climatol.* **2018**, *57*, 235–253.
47. Wang, X.; Liu, H.; Miao, S.; Wu, Q.; Zhang, N.; Qiao, F. Effectiveness of urban hydrological processes in mitigating urban heat island and human thermal stress during a heat wave event in Nanjing, China. *J. Geophys. Res. Atmos.* **2020**, *125*, e2020JD033275.

48. Masson, V.; Lion, Y.; Peter, A.; Pigeon, G.; Buyck, J.; Brun, E. "Grand Paris": Regional landscape change to adapt city to climate warming. *Clim. Chang.* **2013**, *117*, 769–782, doi:10.1007/s10584-012-0579-1.
49. Daniel, M.; Lemonsu, A.; Vigié, V. Role of watering practices in large-scale urban planning strategies to face the heat-wave risk in future climate. *Urban Clim.* **2018**, *23*, 287–308, doi:10.1016/j.uclim.2016.11.001.
50. Macintyre, H.L.; Heaviside, C. Potential benefits of cool roofs in reducing heat-related mortality during heatwaves in a European city. *Environ. Int.* **2019**, *127*, 430–441, doi:10.1016/j.envint.2019.02.065.
51. Fallmann, J.; Forkel, R.; Emeis, S. Secondary effects of urban heat island mitigation measures on air quality. *Atmos. Environ.* **2016**, *125*, 199–211, doi:10.1016/j.atmosenv.2015.10.094.
52. Alavipanah, S.; Wegmann, M.; Qureshi, S.; Weng, Q.; Koellner, T. The Role of Vegetation in Mitigating Urban Land Surface Temperatures: A Case Study of Munich, Germany during the Warm Season. *Sustainability* **2015**, *7*, 4689–4706, doi:10.3390/su7044689.
53. Imran, H.M.; Kala, J.; Ng, A.W.M.; Muthukumaran, S. Effectiveness of green and cool roofs in mitigating urban heat island effects during a heatwave event in the city of Melbourne in southeast Australia. *J. Clean. Prod.* **2018**, *197*, 393–405, doi:10.1016/j.jclepro.2018.06.179.
54. Imran, H.M.; Kala, J.; Ng, A.W.M.; Muthukumaran, S. Effectiveness of vegetated patches as Green Infrastructure in mitigating Urban Heat Island effects during a heatwave event in the city of Melbourne. *Weather. Clim. Extrem.* **2019**, *25*, 100217, doi:10.1016/j.wace.2019.100217.
55. Giannaros, C.; Nenes, A.; Giannaros, T.M.; Kourtidis, K.; Melas, D. A comprehensive approach for the simulation of the Urban Heat Island effect with the WRF/SLUCM modeling system: The case of Athens (Greece). *Atmos. Res.* **2018**, *201*, 86–101, doi:10.1016/j.atmosres.2017.10.015.
56. Morini, E.; Touchaei, A.; Castellani, B.; Rossi, F.; Cotana, F. The Impact of Albedo Increase to Mitigate the Urban Heat Island in Terni (Italy) Using the WRF Model. *Sustainability* **2016**, *8*, 999, doi:10.3390/su8100999.
57. Geleti, J.; Lehnert, M.; Jurek, M. Spatiotemporal variability of air temperature during a heat wave in real and modified landcover conditions: Prague and Brno (Czech Republic). *Urban Clim.* **2020**, *31*, 100588, doi:10.1016/j.uclim.2020.100588.
58. Jandaghian, Z.; Berardi, U. Analysis of the cooling effects of higher albedo surfaces during heat waves coupling the Weather Research and Forecasting model with building energy models. *Energy Build.* **2020**, *207*, 109627, doi:10.1016/j.enbuild.2019.109627.
59. Touchaei, A.G.; Akbari, H.; Tessum, C.W. Effect of increasing urban albedo on meteorology and air quality of Montreal (Canada)—Episodic simulation of heat wave in 2005. *Atmos. Environ.* **2016**, *132*, 188–206, doi:10.1016/j.atmosenv.2016.02.033.
60. Wang, M.; Yan, X.; Liu, J.; Zhang, X. The contribution of urbanization to recent extreme heat events and a potential mitigation strategy in the Beijing–Tianjin–Hebei metropolitan area. *Theor. Appl. Climatol.* **2013**, *114*, 407–416, doi:10.1007/s00704-013-0852-x.
61. Ma, H.; Shao, H.; Song, J. Modeling the relative roles of the foehn wind and urban expansion in the 2002 Beijing heat wave and possible mitigation by high reflective roofs. *Meteorol. Atmos. Phys.* **2014**, *123*, 105–114, doi:10.1007/s00703-013-0289-x.
62. Sun, T.; Grimmond, C.S.B.; Ni, G.-H. How do green roofs mitigate urban thermal stress under heat waves? *J. Geophys. Res. : Atmos.* **2016**, *121*, 5320–5335, doi:10.1002/2016jd024873.
63. Sun, T.; Kotthaus, S.; Li, D.; Ward, H.C.; Gao, Z.; Ni, G.-H.; Grimmond, C.S.B. Attribution and mitigation of heat wave-induced urban heat storage change. *Environ. Res. Lett.* **2017**, *12*, 114007, doi:10.1088/1748-9326/aa922a.
